# Supplementary material
Source: Springer Nature journal article supplement (https://www.springermedizin.de/resource/supplementary/12974_2010_355_MOESM7_ESM.pdf/9601516)

**a**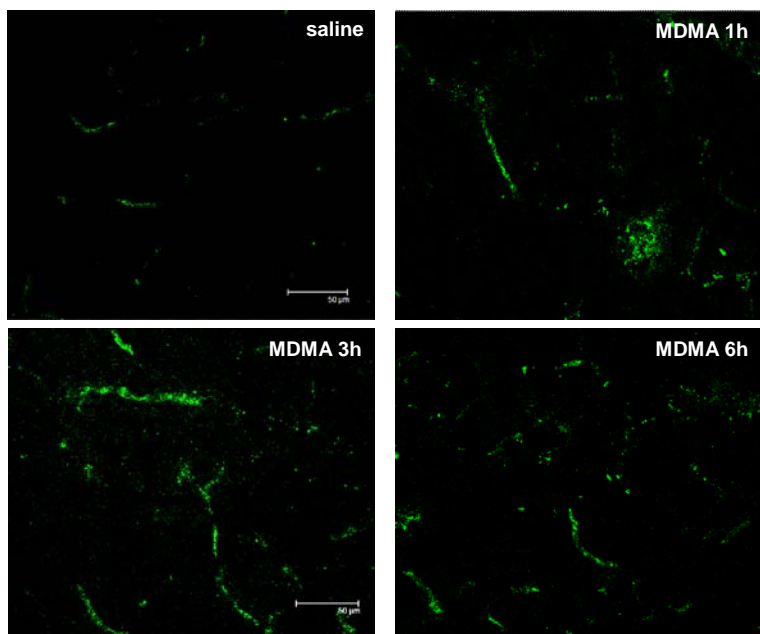**b**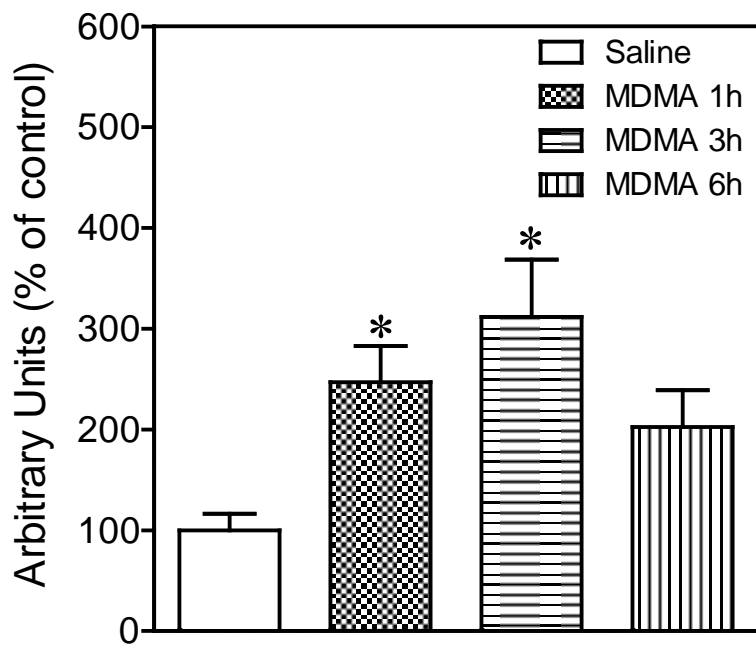

Supplement: MOESM7 [file 9601516]
